# Supplementary material for: Preparation of Co3O4 nanoparticles in a lyotropic liquid crystal medium and their application in anti-bacterial, anti-cancer and catalytic activities
Source: Research Square preprint supplement (doi:10.21203/rs.3.rs-3412668/v1), 2023-10-17
Supplement: Supplementary file 1 [file 87f0f40b5584746240da62ce.docx]

**Preparation of Co3O4 nanoparticles in a lyotropic liquid crystal medium and their application in anti-bacterial, anti-cancer and catalytic activities**

N. Santhiyaa, PR. Meyyathala,b, and S. Umadevia*

*aDepartment of Industrial Chemistry, Alagappa University, Karaikudi-630003, Tamil Nadu, India.*

*bDistrict Institute of Education and Training (DIET), Kalaiyarkoil, Sivagangai-630551, Tamil Nadu, India.*

E-mail: [umadevilc@gmail.com](mailto:umadevilc@gmail.com) and [umadevis@alagappauniversity.ac.in](mailto:umadevis@alagappauniversity.ac.in)


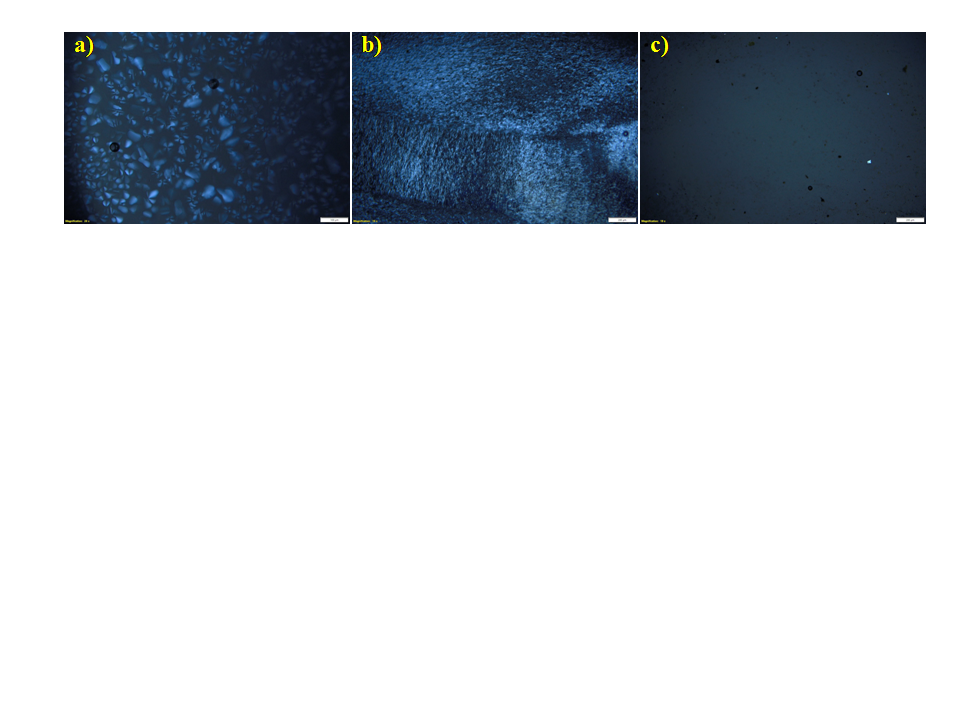


**Fig.S1. POM images of a) TX-100/H2O (4.2:5.8 wt%), 25◦C b) TX-100/H2O/Co3O4 NPs 25◦C c) isotropic phase at 29◦C.**

**
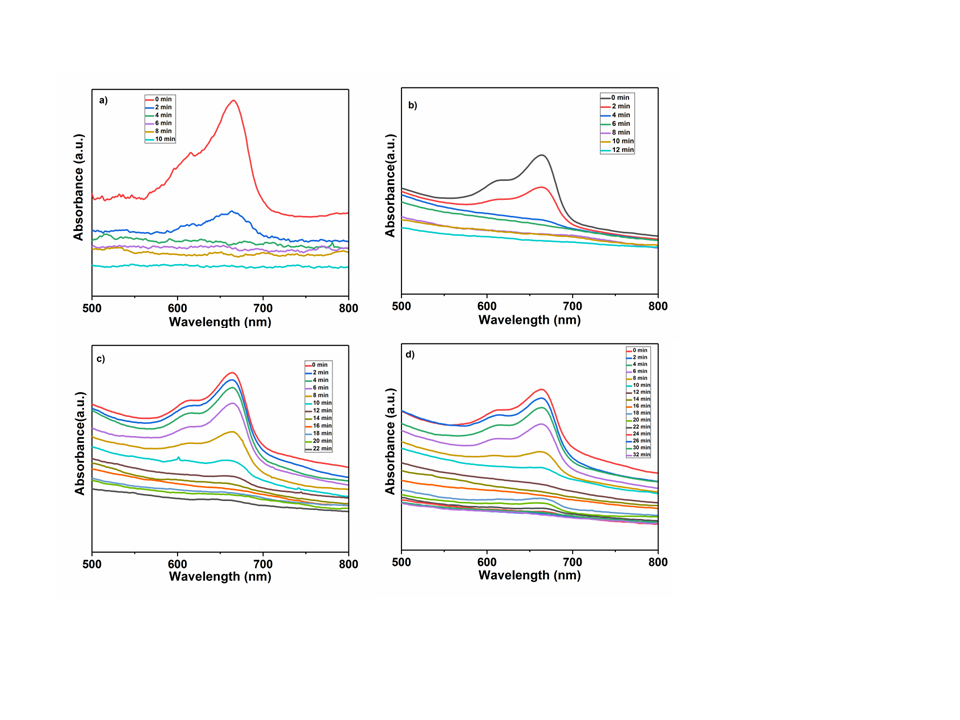
**

**Fig. S2. UV-vis absorption spectra for the recyclability of MB a) 2nd b) 3rd c) 4th d) 5th cycles**

**
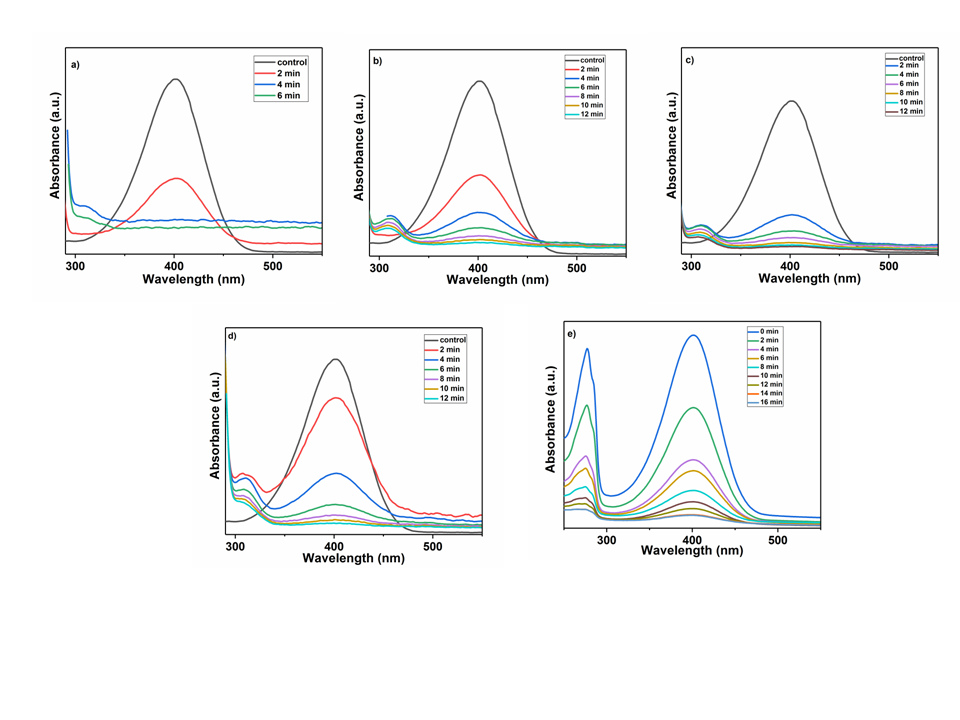
**

**Fig.S3. UV-vis absorption spectra for the recyclability of 4-nitrophenol to 4-aminophenol a) 1st b) 2nd c) 3rd d) 4th e) 5th cycles.**
